# Supplementary material for: CLOE: Identification of putative functional relationships among genes by comparison of expression profiles between two species
Source: Springer Nature journal article supplement (doi:10.1186/1471-2105-5-179), 2004-11-19
Supplement: 12859_2004_295_MOESM1_ESM.pdf [file 12859_2004_295_MOESM1_ESM.pdf]

**Microarray databases**

First species dataset

Second species dataset

*Ranking by normalized Pearson*

Rank intervals

1

2

3

98

99

100

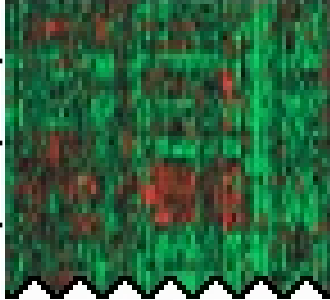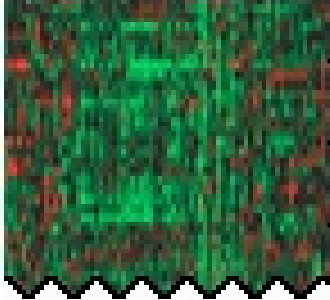

1

2

3

98

99

100

Rank intervals

*Identification of orthologous pairs in a fixed top rank interval*

Overrepresented GO keywords

**Putative annotation**
