# Supplementary material for: CLOE: Identification of putative functional relationships among genes by comparison of expression profiles between two species
Source: Springer Nature journal article supplement (doi:10.1186/1471-2105-5-179), 2004-11-19

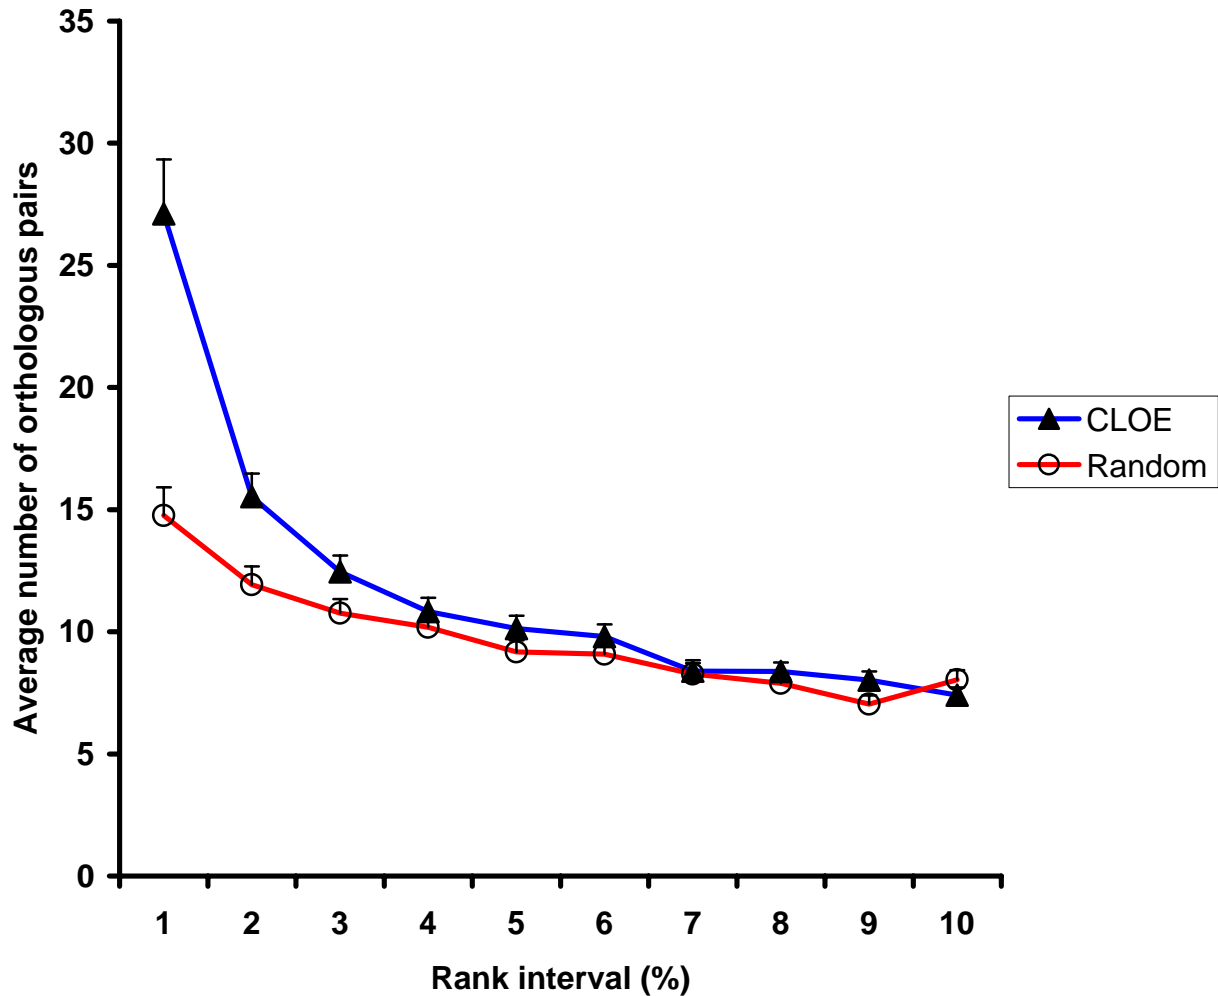

Supplement: 12859_2004_295_MOESM2_ESM.pdf [file 12859_2004_295_MOESM2_ESM.pdf]
